# Supplementary material for: Relationship Between Mortality and Use of Sodium Bicarbonate at the Time of Dialysis Initiation: A Prospective Observational Study
Source: Research Square preprint supplement (doi:10.21203/rs.3.rs-154538/v1), 2021-02-11

# Relationship between mortality and use of sodium bicarbonate at the time of dialysis initiation: a prospective observational study

Hikaru Morooka,<sup>1</sup> Junichiro Yamamoto<sup>2</sup>, Akihito Tanaka,<sup>1</sup> Daijo Inaguma<sup>3</sup>, Shoichi Maruyama<sup>4</sup>

<sup>1</sup>Division of Nephrology, Nagoya University Hospital, Nagoya, Japan

<sup>2</sup>Division of Nephrology, Tsushima City Hospital, Tsushima, Japan

<sup>3</sup>Division of Internal Medicine, Fujita Health University Bantane Hospital, Nagoya, Japan

<sup>4</sup>Division of Nephrology, Nagoya University Graduate School of Medicine, Nagoya, Japan

Corresponding author: Akihito Tanaka

Division of Nephrology,

Nagoya University Hospital

Tsurumaicho, 65, Showa Ward, Nagoya, Aichi, Japan

Tel: +81-52-741-2111

Fax: +81-52-744-2209

E-mail: [tanaka17@med.nagoya-u.ac.jp](mailto:tanaka17@med.nagoya-u.ac.jp)

Supplemental material

Supplementary figure 1: Kaplan-Meier plot for CVD-related death in matched patients with and without use of oral sodium bicarbonate before dialysis initiation. CVD; cardiovascular disease.

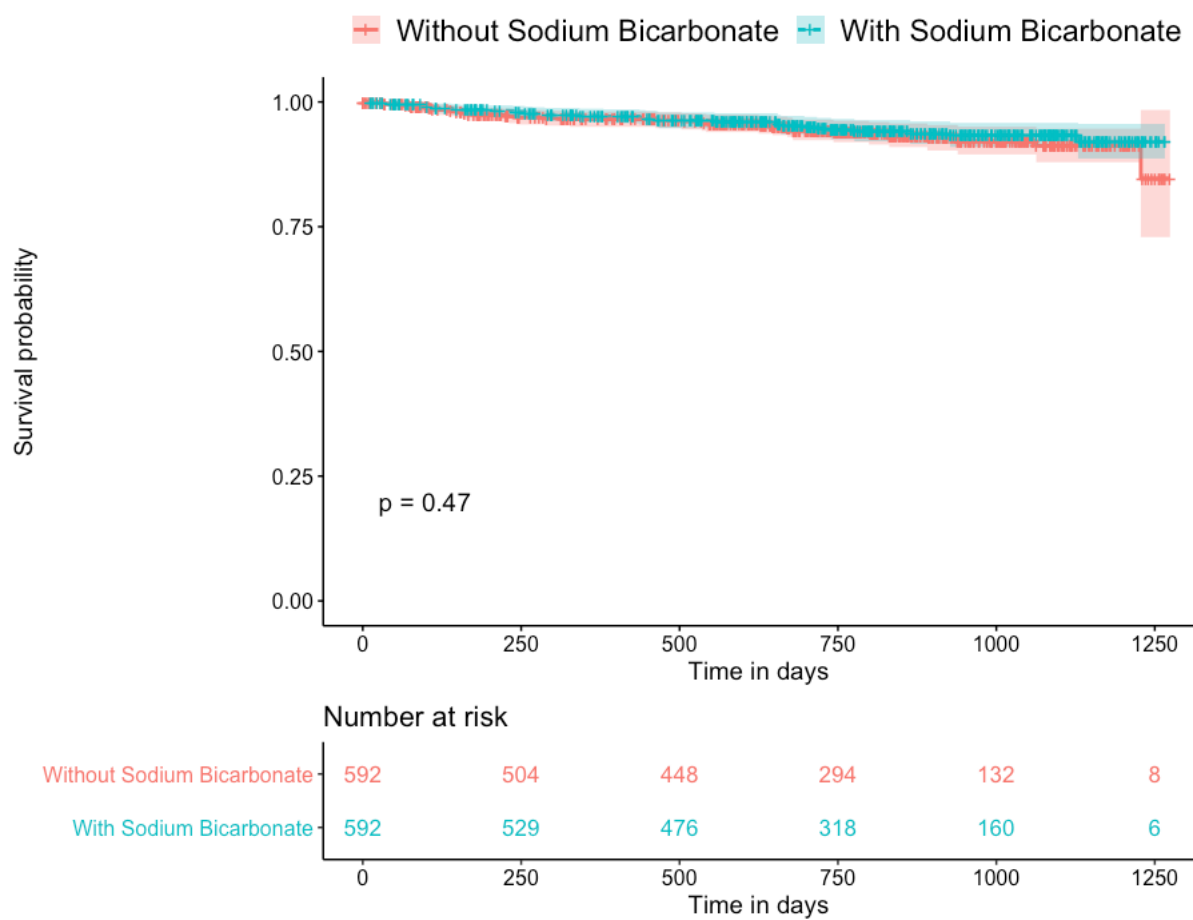

Supplementary figure 2: Kaplan-Meier plot for infection-related death in matched patients with and without use of oral sodium bicarbonate before dialysis initiation.

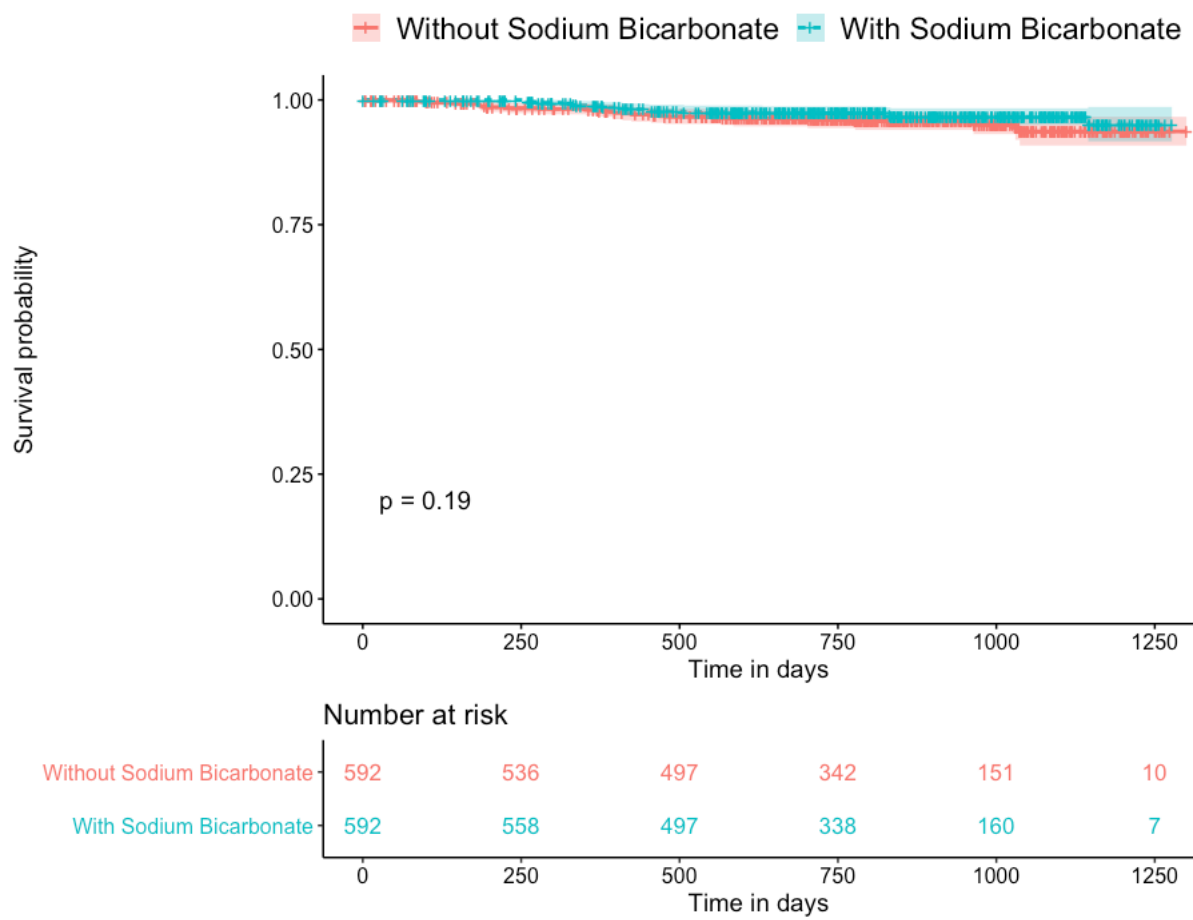

Supplement: Supplementary file [file 694a149fea7db1b9350fd864.pdf]
